# Supplementary material for: Physico-geometrical kinetics of the thermal dehydration of sodium carbonate monohydrate as a compacted composite of inorganic hydrate comprising crystalline particles and matrix
Source: Royal Society of Chemistry journal article supplement (doi:10.1039/d2cp01948e), 2022-01-01
Supplement: d2cp01948e1.pdf [file d2cp01948e1.pdf]

# Physico-geometrical kinetics of the thermal dehydration of sodium carbonate monohydrate as a compacted composite of inorganic hydrate comprising crystalline particles and matrix

Yuto Zushi, Shun Iwasaki, and Nobuyoshi Koga\*

Department of Science Education, Division of Educational Sciences, Graduate School of Humanities and Social Sciences, Hiroshima University, 1-1-1 Kagamiyama, Higashi-Hiroshima 739-8524, Japan

## Contents

|                                                                                                                                                                                                                                                                                                                                                                                                                                                                   |    |
|-------------------------------------------------------------------------------------------------------------------------------------------------------------------------------------------------------------------------------------------------------------------------------------------------------------------------------------------------------------------------------------------------------------------------------------------------------------------|----|
| S1. Sample characterization .....                                                                                                                                                                                                                                                                                                                                                                                                                                 | s2 |
| Figure S1. Appearance of the sample particles. ....                                                                                                                                                                                                                                                                                                                                                                                                               | s2 |
| Figure S2. XRD pattern of the sample. ....                                                                                                                                                                                                                                                                                                                                                                                                                        | s2 |
| Figure S3. FTIR spectrum of the sample. ....                                                                                                                                                                                                                                                                                                                                                                                                                      | s2 |
| Table S1. Assignments of the IR absorption peaks .....                                                                                                                                                                                                                                                                                                                                                                                                            | s2 |
| S2. Thermal dehydration behavior .....                                                                                                                                                                                                                                                                                                                                                                                                                            | s2 |
| Figure S4. Changes in the XRD pattern of the sample during stepwise isothermal heating: XRD patterns at (a) various temperatures and (b) 373 K. ....                                                                                                                                                                                                                                                                                                              | s2 |
| Figure S5. Changes in the XRD patterns of the sample during the isothermal heating at 343 K: (a) XRD patterns at different heating times and (b) changes in the diffraction peak assigned to (0, 0, 2) and the crystallite size of Na <sub>2</sub> CO <sub>3</sub> in relation to heating time. ....                                                                                                                                                              | s3 |
| S3. Kinetic analysis .....                                                                                                                                                                                                                                                                                                                                                                                                                                        | s3 |
| S3-1. Formal kinetic analysis .....                                                                                                                                                                                                                                                                                                                                                                                                                               | s3 |
| Figure S6. A typical CRTA record for the thermal dehydration of SC-MH ( $m_0 = 5.02$ mg) recorded at $C = 15$ $\mu\text{g min}^{-1}$ under dry N <sub>2</sub> gas flow ( $q_v = 300$ $\text{cm}^3 \text{min}^{-1}$ ). ....                                                                                                                                                                                                                                        | s3 |
| Figure S7. Kinetic data for the thermal dehydration of SC-MH under dry N <sub>2</sub> gas flow recorded under isothermal, linear nonisothermal, and CRTA conditions. ....                                                                                                                                                                                                                                                                                         | s3 |
| S3-2. Morphological changes during the thermal dehydration. ....                                                                                                                                                                                                                                                                                                                                                                                                  | s3 |
| Figure S8. SEM images of the sample surface recorded by ex situ observation for the sample thermally treated by heating to different temperatures at a $\beta$ of 5 K $\text{min}^{-1}$ under dry N <sub>2</sub> gas flow: (a) $T = 339$ K ( $\alpha = 0.02$ ), (b) $T = 348$ K ( $\alpha = 0.04$ ), (c) $T = 349$ K ( $\alpha = 0.04$ ), (d) $T = 355$ K ( $\alpha = 0.12$ ), (e) $T = 373$ K ( $\alpha = 0.70$ ), and (f) $T = 390$ K ( $\alpha = 1.00$ ). .... | s3 |
| S3-3. Mathematical deconvolution analysis .....                                                                                                                                                                                                                                                                                                                                                                                                                   | s4 |
| ■ Weibull Function .....                                                                                                                                                                                                                                                                                                                                                                                                                                          | s4 |
| Figure S9. The results of the MDA applied to the DTG curve for the thermal dehydration of SC-MH at different $\beta$ values under dry N <sub>2</sub> gas flow. ....                                                                                                                                                                                                                                                                                               | s4 |
| Table S2. The results of the MDA and subsequent formal kinetic analysis of the mathematically separated reaction steps of the thermal dehydration of SC-MH. ....                                                                                                                                                                                                                                                                                                  | s5 |
| Figure S10. Kinetic curves for the two component reaction steps derived by the MDA: (a) first step ( $i = 1$ ) and (b) second step ( $i = 2$ ). ....                                                                                                                                                                                                                                                                                                              | s5 |
| Figure S11. Isoconversional kinetic analysis for the individual reaction steps separated by the MDA: (a) Friedman plots for the first reaction step, (b) Friedman plots for the second reaction step, (c) $E_{a,i}$ values at various $\alpha_i$ values, and (d) experimental master plots of $(d\alpha_i/d\theta_i)$ versus $\alpha_i$ . ....                                                                                                                    | s5 |
| S3-4. Kinetic analysis based on the SR-PBR( $n$ ) model .....                                                                                                                                                                                                                                                                                                                                                                                                     | s6 |
| Table S3. Optimized $k_{\text{SR}}$ and $k_{\text{PBR}(3)}$ values for the first reaction step of the thermal dehydration of SC-MH at different temperatures .....                                                                                                                                                                                                                                                                                                | s6 |

\* Corresponding author; e-mail: nkoga@hiroshima-u.ac.jp

## S1. Sample characterization

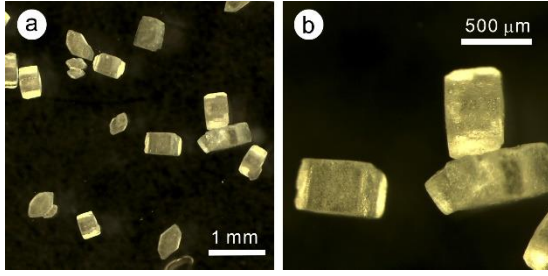

**Figure S1.** Appearance of the sample particles.

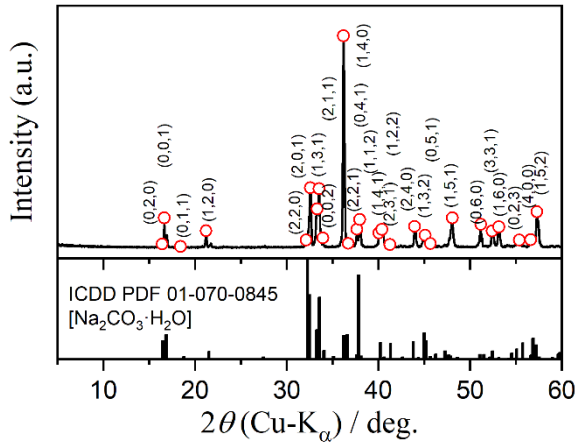

**Figure S2.** XRD pattern of the sample.

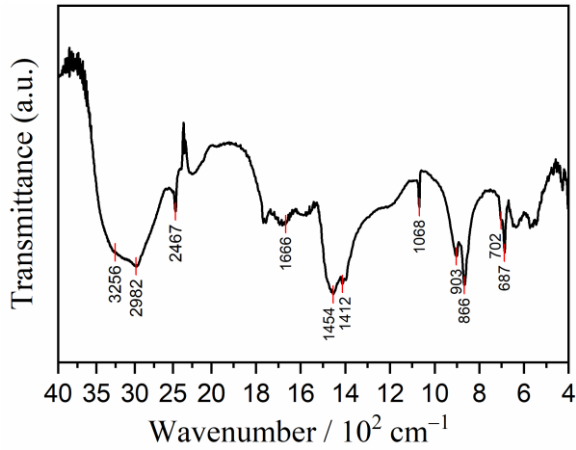

**Figure S3.** FTIR spectrum of the sample.

**Table S1.** Assignments of the IR absorption peaks

| Peak position / $\text{cm}^{-1}$ | Vibration mode                         |
|----------------------------------|----------------------------------------|
| 3256                             | $\nu_s$ (O–H)                          |
| 2982                             | $2\nu_4$ ( $\text{CO}_3^{2-}$ )        |
| 2467                             | $\nu_1 + \nu_4$ ( $\text{CO}_3^{2-}$ ) |
| 1666                             | bending (O–H)                          |
| 1500–1400                        | $\nu_3$ ( $\text{CO}_3^{2-}$ )         |
| 1068                             | $\nu_1$ ( $\text{CO}_3^{2-}$ )         |
| 866                              | $\nu_2$ ( $\text{CO}_3^{2-}$ )         |
| 702, 687                         | $\nu_4$ ( $\text{CO}_3^{2-}$ )         |

## S2. Thermal dehydration behavior

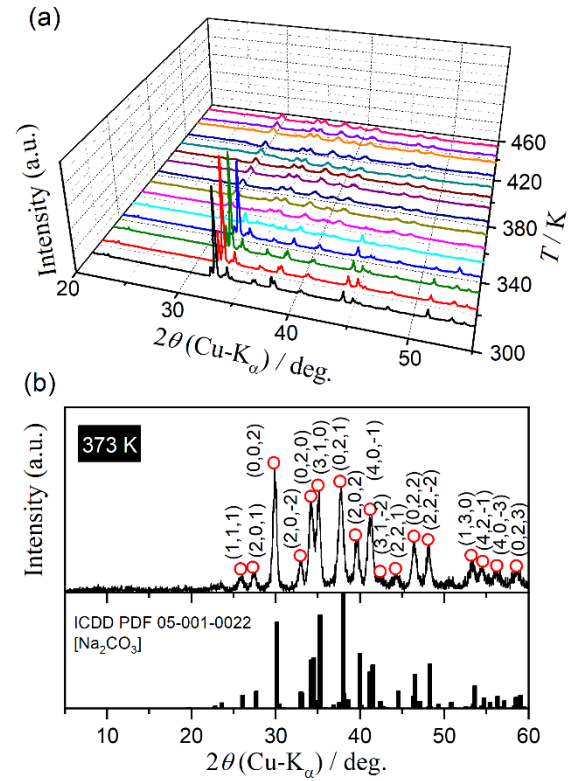

**Figure S4.** Changes in the XRD pattern of the sample during stepwise isothermal heating: XRD patterns at (a) various temperatures and (b) 373 K.

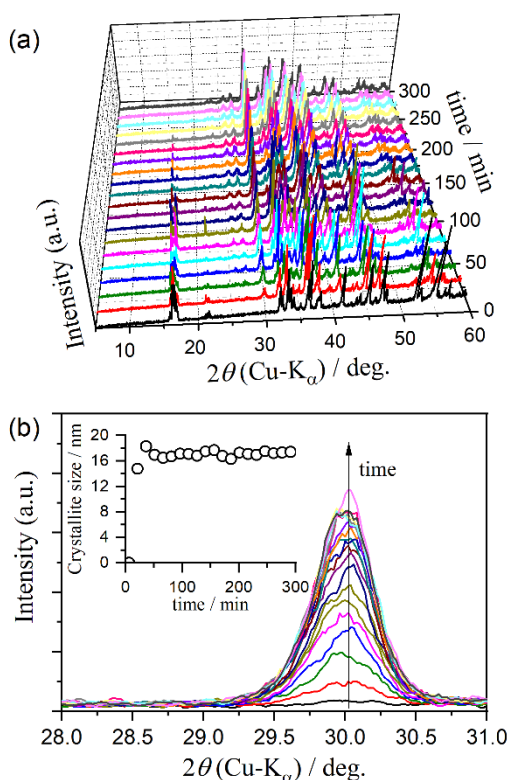

**Figure S5.** Changes in the XRD patterns of the sample during the isothermal heating at 343 K: (a) XRD patterns at different heating times and (b) changes in the diffraction peak assigned to (0, 0, 2) and the crystallite size of Na<sub>2</sub>CO<sub>3</sub> in relation to heating time.

### S3. Kinetic analysis

#### S3-1. Formal kinetic analysis

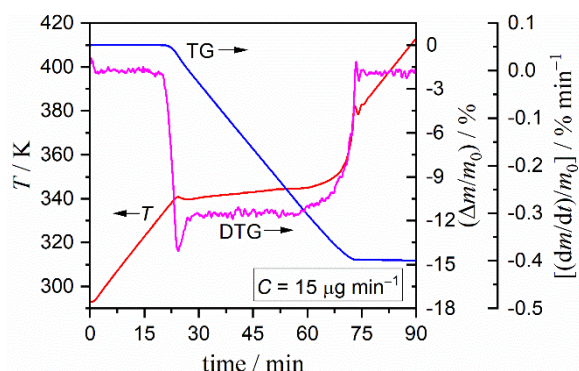

**Figure S6.** A typical CRTA record for the thermal dehydration of SC-MH ( $m_0 = 5.02$  mg) recorded at  $C = 15 \mu\text{g min}^{-1}$  under dry N<sub>2</sub> gas flow ( $q_v = 300 \text{ cm}^3 \text{ min}^{-1}$ ).

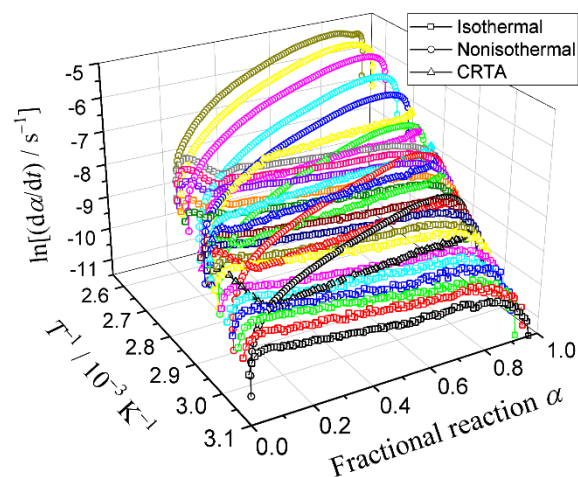

**Figure S7.** Kinetic data for the thermal dehydration of SC-MH under dry N<sub>2</sub> gas flow recorded under isothermal, linear nonisothermal, and CRTA conditions.

#### S3-2. Morphological changes during the thermal dehydration

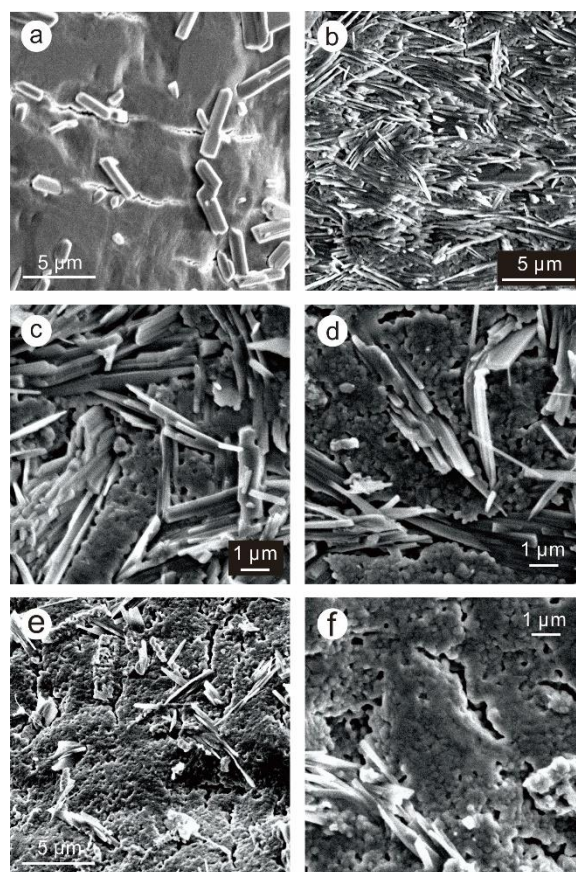

**Figure S8.** SEM images of the sample surface recorded by ex situ observation for the sample thermally treated by heating to different temperatures at a  $\beta$  of  $5 \text{ K min}^{-1}$  under dry N<sub>2</sub> gas flow: (a)  $T = 339 \text{ K}$  ( $\alpha = 0.02$ ), (b)  $T = 348 \text{ K}$  ( $\alpha = 0.04$ ), (c)  $T = 349 \text{ K}$  ( $\alpha = 0.04$ ), (d)  $T = 355 \text{ K}$  ( $\alpha = 0.12$ ), (e)  $T = 373 \text{ K}$  ( $\alpha = 0.70$ ), and (f)  $T = 390 \text{ K}$  ( $\alpha = 1.00$ ).



## S3-3. Mathematical deconvolution analysis

## ■ Weibull Function

$$y = a_0 \left( \frac{a_3 - 1}{a_3} \right)^{\frac{1-a_3}{a_3}} \left\{ \frac{x - a_1}{a_2} + \left( \frac{a_3 - 1}{a_3} \right)^{\frac{1}{a_3}} \right\}^{a_3 - 1} \exp \left[ - \left\{ \frac{x - a_1}{a_2} + \left( \frac{a_3 - 1}{a_3} \right)^{\frac{1}{a_3}} \right\}^{a_3} + \frac{a_3 - 1}{a_3} \right] \quad (S1)$$

Figure S9 shows the results of the MDA applied to the DTG curves for the thermal dehydration of  $\text{Na}_2\text{CO}_3 \cdot \text{H}_2\text{O}$  at different  $\beta$  values under dry  $\text{N}_2$  gas flow. Irrespective of the  $\beta$  value, the overall DTG peak was successfully deconvoluted into two partially overlapping peaks using the Weibull functions. Also, the contributions ( $c_i$ ) of each reaction step was calculated from the peak areas were also invariant over the process at different  $\beta$  values. The average  $c_i$  values are listed in Table S2. The kinetic curves for each reaction step at different  $\beta$  values were calculated from the mathematically separated DTG peaks as shown in Figure S10. The kinetic curves for each reaction step were subjected to a formal kinetic analysis via the Friedman plot and subsequent master plot method (Figure S11). The kinetic parameters obtained by the kinetic analysis based on the MDA are listed in Table S2.

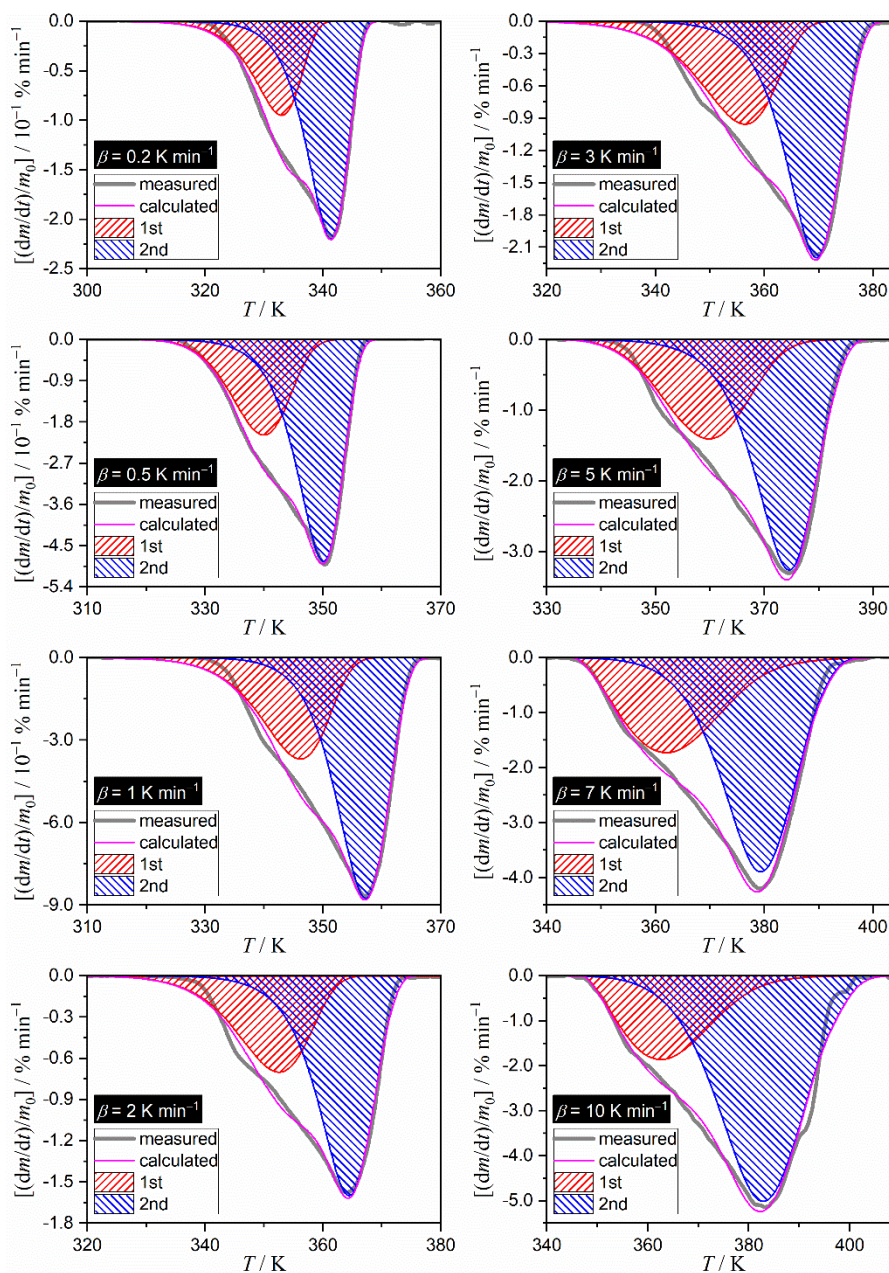

**Figure S9.** The results of the MDA applied to the DTG curve for the thermal dehydration of SC-MH at different  $\beta$  values under dry  $\text{N}_2$  gas flow.

**Table S2.** The results of the MDA and subsequent formal kinetic analysis of the mathematically separated reaction steps of the thermal dehydration of SC-MH

| Step $i$ | $c_i$           | $E_{a,i} / \text{kJ mol}^{-1}, \text{^a}$ | $\frac{d\alpha_i}{d\theta_i} = A_i\alpha^{m_i}(1 - \alpha_i)^{n_i}[-\ln(1 - \alpha_i)]^{p_i}$ |                  |                 |                  |                  |
|----------|-----------------|-------------------------------------------|-----------------------------------------------------------------------------------------------|------------------|-----------------|------------------|------------------|
|          |                 |                                           | $A_i / \text{s}^{-1}$                                                                         | $m_i$            | $n_i$           | $p_i$            | $R^2, \text{^b}$ |
| 1        | $0.36 \pm 0.03$ | $93.7 \pm 14.6$                           | $(4.69 \pm 0.03) \times 10^{11}$                                                              | $0.81 \pm 0.06$  | $0.78 \pm 0.02$ | $-0.42 \pm 0.05$ | 0.9999           |
| 2        | $0.64 \pm 0.03$ | $83.3 \pm 5.3$                            | $(5.95 \pm 0.02) \times 10^9$                                                                 | $-0.23 \pm 0.02$ | $1.09 \pm 0.01$ | $0.84 \pm 0.02$  | 0.9999           |

<sup>a</sup> Averaged over  $0.1 \leq \alpha_i \leq 0.9$ .

<sup>b</sup> Determination coefficient of the nonlinear least-squares analysis for fitting the experimental master plot with SB( $m, n, p$ ) model.

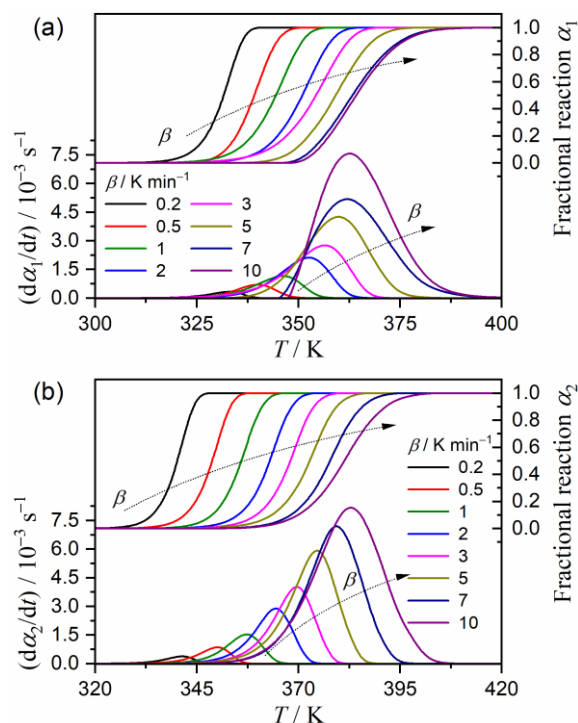**Figure S10.** Kinetic curves for the two component reaction steps derived by the MDA: (a) first step ( $i = 1$ ) and (b) second step ( $i = 2$ ).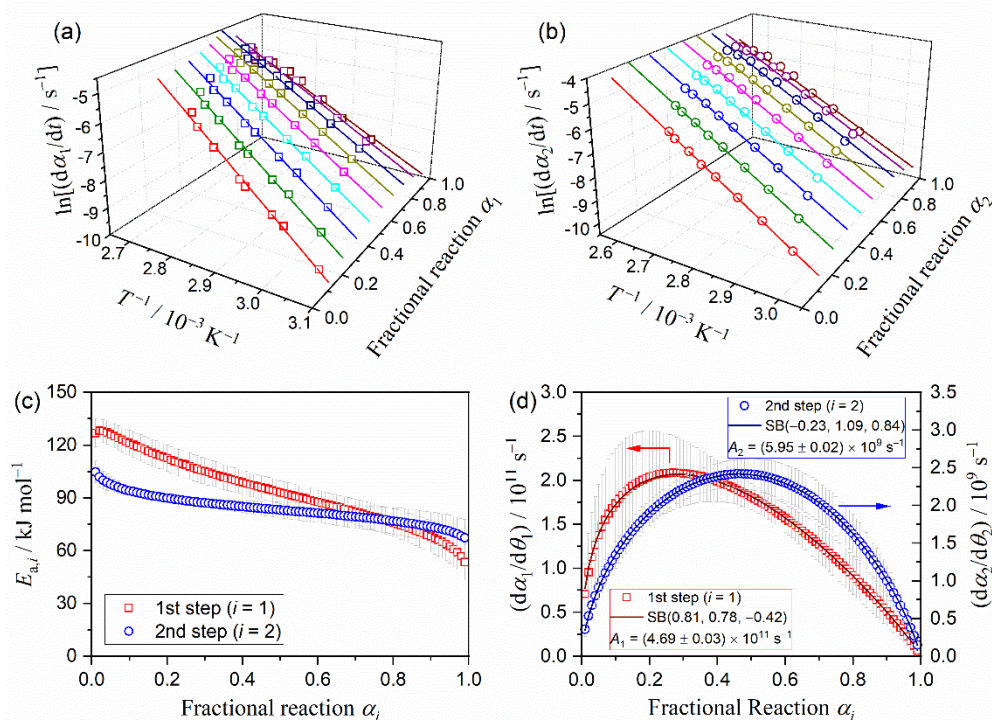**Figure S11.** Isoconversional kinetic analysis for the individual reaction steps separated by the MDA: (a) Friedman plots for the first reaction step, (b) Friedman plots for the second reaction step, (c)  $E_{a,i}$  values at various  $\alpha_i$  values, and (d) experimental master plots of  $(d\alpha_i/d\theta_i)$  versus  $\alpha_i$ .

S3-4. Kinetic analysis based on the SR–PBR(*n*) model

**Table S3.** Optimized  $k_{\text{SR}}$  and  $k_{\text{PBR}(3)}$  values for the first reaction step of the thermal dehydration of SC-MH at different temperatures

| $T / \text{K}$ | $k_{\text{SR}} / 10^{-4} \text{ s}^{-1}$ | $k_{\text{PBR}(3)} / 10^{-4} \text{ s}^{-1}$ | $R^2$  |
|----------------|------------------------------------------|----------------------------------------------|--------|
| 320.8          | 2.293                                    | 0.521                                        | 0.9987 |
| 322.7          | 2.511                                    | 0.641                                        | 0.9901 |
| 324.2          | 3.860                                    | 1.098                                        | 0.9993 |
| 326.1          | 5.338                                    | 1.367                                        | 0.9982 |
| 328.0          | 6.639                                    | 1.701                                        | 0.9966 |
| 329.9          | 7.406                                    | 2.046                                        | 0.9988 |
| 331.7          | 8.879                                    | 2.396                                        | 0.9985 |
| 334.0          | 7.321                                    | 5.141                                        | 0.9970 |
| 336.2          | 11.647                                   | 7.267                                        | 0.9975 |
| 338.1          | 13.289                                   | 7.672                                        | 0.9982 |
| 340.1          | 16.086                                   | 11.545                                       | 0.9969 |
| 341.9          | 19.468                                   | 13.835                                       | 0.9958 |
| 344.0          | 19.834                                   | 24.675                                       | 0.9900 |
| 345.9          | 25.452                                   | 42.651                                       | 0.9746 |
| 348.0          | 24.817                                   | 16.175                                       | 0.9917 |
